# Supplementary material
Source: PubMed Central journal article supplement (PMC7960396)
Supplement: 16-00874.pdf [file 16-00874.pdf]

**On-line Table 1: Characteristics of the studied sample at MRI**

|                                                   | Included (n = 1228) |       | Excluded (n = 62) |       | P Value |
|---------------------------------------------------|---------------------|-------|-------------------|-------|---------|
|                                                   | Mean                | SD    | Mean              | SD    |         |
| Age (yr)                                          | 70.60               | 8.92  | 71.69             | 10.28 | .10     |
| Male sex (%)                                      | 41                  |       | 19                |       | .001    |
| Hispanic (%)                                      | 65                  |       | 79                |       | .03     |
| Black (%)                                         | 18                  |       | 11                |       | .20     |
| Hypertension at MRI (%)                           | 84                  |       | 95                |       | .02     |
| Hypertension during follow-up (%)                 | 91                  |       | 97                |       | .10     |
| Average systolic BP at MRI (mm Hg)                | 136.30              | 17.49 | 139.24            | 17.77 | .82     |
| Average diastolic BP at MRI (mm Hg)               | 78.08               | 9.64  | 76.78             | 10.19 | .50     |
| Pulse pressure at MRI (mm Hg)                     | 58.22               | 15.03 | 62.46             | 15.50 | .69     |
| Use of antihypertensives at MRI (%)               | 64                  |       | 79                |       | .02     |
| Use of antihypertensive at the last follow-up (%) | 78                  |       | 90                |       | .02     |
| Hypercholesterolemia at MRI (%)                   | 69                  |       | 73                |       | .56     |
| Hypercholesterolemia at the last follow-up (%)    | 81                  |       | 84                |       | .57     |
| Total cholesterol (mg/dL)                         | 193.99              | 39.54 | 189.95            | 40.01 | .85     |
| LDL (mg/dL)                                       | 115.48              | 35.43 | 112.28            | 34.91 | .93     |
| Diabetes at MRI visit (%)                         | 25                  |       | 44                |       | .001    |
| Diabetes at the last follow-up (%)                | 37                  |       | 56                |       | .002    |
| Fasting blood glucose (mg/dL)                     | 100.70              | 33.77 | 109.10            | 35.66 | .52     |
| Smoking at MRI (%)                                | 16                  |       | 18                |       | .71     |
| Persistent smoking during follow-up (%)           | 7                   |       | 0                 |       | .02     |
| Any cardiac disease (%)                           | 16                  |       | 27                |       | .02     |
| Body mass index                                   | 28.33               | 4.99  | 29.65             | 5.57  | .20     |

**Note:**—BP indicates blood pressure; LDL, low-density lipoprotein.

**On-line Table 2: Cross-sectional associations between perivascular spaces and vascular risks<sup>a</sup>**

| Parameter                   | Small PVS         |      |         | Large PVS         |      |         |
|-----------------------------|-------------------|------|---------|-------------------|------|---------|
|                             | Adjusted Estimate | SE   | P Value | Adjusted Estimate | SE   | P Value |
| Age (per 5 yr)              | 0.05              | 0.01 | .001    | −0.04             | 0.03 | .15     |
| Male sex                    | −0.13             | 0.05 | .01     | −0.06             | 0.11 | .58     |
| Hispanic                    | 0.01              | 0.06 | .94     | 0.09              | 0.13 | .47     |
| Black                       | 0.08              | 0.07 | .22     | −0.03             | 0.15 | .85     |
| Hypertension (%)            | 0.14              | 0.05 | .001    | 0.52              | 0.11 | .0001   |
| Hypercholesterolemia (%)    | 0.00              | 0.04 | .97     | −0.06             | 0.09 | .54     |
| Diabetes (%)                | 0.03              | 0.04 | .50     | 0.03              | 0.10 | .79     |
| Current smoking (%)         | 0.03              | 0.05 | .61     | −0.05             | 0.11 | .67     |
| Any cardiac disease (%)     | 0.01              | 0.05 | .78     | −0.04             | 0.12 | .71     |
| Body mass index             | −0.01             | 0.01 | .07     | −0.03             | 0.01 | .001    |
| Percentage of brain atrophy | −0.01             | 0.01 | .34     | 0.01              | 0.01 | .64     |

**Note:**—SE indicates standard error.

<sup>a</sup>The Poisson regression model was also adjusted for motion artifacts and head size.

**On-line Table 3: Incidence rate per 1000 person-year follow-up**

|                     | All Deaths       | Vascular Death   | Myocardial Infarction | Any Stroke      | Any Vascular Event |
|---------------------|------------------|------------------|-----------------------|-----------------|--------------------|
| No. of events       | 300              | 113              | 68                    | 88              | 218                |
| Overall             | 27.5 (24.7–30.8) | 10.4 (8.6–12.5)  | 6.4 (5.1–8.1)         | 8.28 (6.7–10.2) | 21.1 (18.4–24.5)   |
| By small PVS groups |                  |                  |                       |                 |                    |
| First tertile       | 25.4 (20.6–31.5) | 7.2 (4.8–10.7)   | 3.3 (1.9–6.0)         | 6.44 (4.2–9.9)  | 15.23 (11.5–20.14) |
| Second tertile      | 23.7 (19.4–28.8) | 10.4 (7.7–14.0)  | 8.3 (5.9–11.6)        | 6.91 (4.8–10.0) | 21.8 (17.7–26.9)   |
| Third tertile       | 34.2 (28.5–40.1) | 13.4 (10.7–17.9) | 7.2 (4.8–10.8)        | 11.8 (8.6–16.1) | 26.0 (21.0–32.2)   |
| By large PVS groups |                  |                  |                       |                 |                    |
| ≤1                  | 27.1 (23–30.7)   | 10.1 (8.2–12.5)  | 5.8 (4.4–7.7)         | 8.2 (6.5–13.3)  | 20.7 (17.1–29.9)   |
| ≥2                  | 29.1 (22.9–36.9) | 11.3 (7.7–16.6)  | 8.6 (5.5–13.4)        | 8.5 (5.4–13.2)  | 22.6 (17.1–29.9)   |

**On-line Table 4: Interaction with pulse pressure**

|                        | All Deaths               | Vascular Death           | Myocardial Infarction   | Any Stroke               | Any Vascular Event       |
|------------------------|--------------------------|--------------------------|-------------------------|--------------------------|--------------------------|
| SPVS score × PP at MRI | 0.007 ( <i>P</i> = .31)  | 0.023 ( <i>P</i> = .011) | 0.012 ( <i>P</i> = .35) | 0.018 ( <i>P</i> = .095) | 0.016 ( <i>P</i> = .019) |
| LPVS score × PP at MRI | −0.003 ( <i>P</i> = .90) | 0.037 ( <i>P</i> = .13)  | 0.04 ( <i>P</i> = .31)  | 0.03 ( <i>P</i> = .44)   | 0.04 ( <i>P</i> = .10)   |

**Note:**—SPVS indicates small perivascular spaces; LPVS, large perivascular spaces.

**On-line Table 5: Interaction with other imaging biomarkers of cerebrovascular disease**

|                             | All Deaths               | Vascular Death           | Myocardial Infarction    | All Strokes             | Any Vascular Event       |
|-----------------------------|--------------------------|--------------------------|--------------------------|-------------------------|--------------------------|
| Small PVS score × WMHV      | 0.001 ( <i>P</i> = .007) | 0.002 ( <i>P</i> = .020) | −0.001 ( <i>P</i> = .99) | 0.002 ( <i>P</i> = .07) | 0.001 ( <i>P</i> = .04)  |
| Small PVS score × LPI       | 0.011 ( <i>P</i> = .49)  | 0.024 ( <i>P</i> = .22)  | 0.041 ( <i>P</i> = .07)  | 0.019 ( <i>P</i> = .35) | 0.024 ( <i>P</i> = .13)  |
| Small PVS score × large PVS | −0.003 ( <i>P</i> = .54) | 0.003 ( <i>P</i> = .70)  | −0.007 ( <i>P</i> = .43) | 0.002 ( <i>P</i> = .81) | −0.001 ( <i>P</i> = .84) |
| Large PVS × WMHV            | −0.001 ( <i>P</i> = .81) | −0.003 ( <i>P</i> = .52) | −0.002 ( <i>P</i> = .79) | 0.002 ( <i>P</i> = .65) | −0.003 ( <i>P</i> = .56) |
| Large PVS × LPI             | 0.104 ( <i>P</i> = .17)  | 0.261 ( <i>P</i> = .01)  | 0.220 ( <i>P</i> = .09)  | 0.060 ( <i>P</i> = .57) | 0.165 ( <i>P</i> = .05)  |
